# Supplementary material for: Transiently Delocalised Hybrid Quantum Statesare the Gateways for Efficient Exciton Dissociationat Organic Donor-Acceptor Interfaces
Source: Research Square preprint supplement (doi:10.21203/rs.3.rs-7059572/v1), 2025-07-23
Supplement: Supplementary file 1 [file a23beb03e39bf36c698a9540.pdf]

1                   Supplementary Information: Transiently  
2                   Delocalised Hybrid Quantum States are the  
3                   Gateways for Efficient Exciton Dissociation at  
4                   Organic Donor-Acceptor Interfaces

5                   Filip Ivanovic<sup>1</sup>, Wei-Tao Peng<sup>2</sup>, Samuele Giannini<sup>3</sup>,  
6                   Jochen Blumberger<sup>1\*</sup>

7                   <sup>1\*</sup>Department of Physics and Astronomy and Thomas Young Centre,  
8                   University College London, Gower Street, London, WC1E 6BT, United  
9                   Kingdom.

10                  <sup>2</sup>Department of Chemistry, Tunghai University, Taiwan Boulevard,  
11                  Taichung City, Section 4, Xitun District, Taiwan.

12                  <sup>3</sup>Department of Chemistry and Industrial Chemistry, University of  
13                  Pisa, Via Giuseppe Moruzzi, Pisa, 56124, Italy.

14                  \*Corresponding author(s). E-mail(s): [j.blumberger@ucl.ac.uk](mailto:j.blumberger@ucl.ac.uk);  
15                  Contributing authors: [ucanfiv@ucl.ac.uk](mailto:ucanfiv@ucl.ac.uk); [pengwt@go.thu.edu.tw](mailto:pengwt@go.thu.edu.tw);  
16                  [samuele.giannini@cnr.it](mailto:samuele.giannini@cnr.it);

## 17 S1 Chemical Master Equation Approach

18 To determine how the populations of the different electronic states would vary if the  
 19 system was restricted to site-to-site hopping, we set up a chemical master equation  
 20 model for the same electronic state space as X-SH, where population transfer was  
 21 restricted to localised states with charges or excitations centred on adjacent molec-  
 22 ular sites. The rate constants for all electron transfer or excitation energy transfer  
 23 steps were calculated with semiclassical Marcus theory[1]. The time-dependent popu-  
 24 lations of all states were obtained analytically using the procedure outlined in previous  
 25 work[2]. Reorganisation energies associated with given type of transfer were set to  
 26 those used in X-SH (Table 1, main text). Driving forces between different CT states  
 27 were set to their differences in the Coulomb electron-hole interaction and the electric  
 28 field. The energy difference between the interfacial XT and iCT states was calcu-  
 29 lated by first sampling the potential energies of eigenstates in simulation (1) where  
 30 XT or CT amplitudes were  $> 90\%$  localised on the interfacial PDI or the interfacial  
 31 a6T:PDI pair, respectively. The mean values of these distributions were subtracted to  
 32 estimate the energy difference between the localised XT and iCT states. The effective  
 33 nuclear frequency of all transfer reactions was set equal to a typical value for organic  
 34 molecules[3]  $1539\text{ cm}^{-1}$ . The electronic or excitonic coupling for each reaction step  
 35 was taken to be the corresponding root-mean-square coupling obtained from the X-  
 36 SH simulation in the respective parameter regime. The activation free energies were  
 37 estimated by first plotting the free energy surfaces of the ground and excited adiabatic  
 38 states, resulting from the coupling between two localised diabatic states, in the vicini-  
 39 ty of the energy of the transition state (when the diabatic energy gap  $\Delta E$  is zero) [4].  
 40 In the normal Marcus regime we take the activation free energy in a given direction  
 41 to be the difference in free energy at the corresponding minimum and the transition  
 42 state (at  $\Delta E = 0$ ) on the ground state adiabatic free energy surface. In the inverted  
 43 Marcus regime, the activation free energy is taken to be the difference in free energy  
 44 at the corresponding minimum and the transition state on the excited state adiabatic  
 45 free energy surface. We note that in the simulation where electronic couplings are dou-  
 46 bled (simulations 2 and 5 in Table 2 main text) the activation energy for ET in the  
 47 PDI acceptor phase disappears because  $\langle |H_{kl}^{\text{ET}}| \rangle > \frac{1}{2}\lambda^{\text{ET}}$ . For the sake of comparing  
 48 X-SH dynamics to the chemical master equation approach, we take in these instances  
 49 the activation free energy to be zero in the downhill direction or equal to the driving  
 50 force in the uphill direction, respectively.

## 51 S2 Preparation of initial states in X-SH

52 **Theory.** The initial active eigenstate in a X-SH trajectory,  $\psi_a(\mathbf{R}(t=0))$ , was chosen  
 53 randomly with a probability  $P(a, \mathbf{R})$  proportional to the probability of sampling a  
 54 nuclear configuration  $\mathbf{R}$  on the ground state potential energy surface of the a6T:PDI  
 55 interface,  $P(\mathbf{R})$ , and the probability for vertical electronic excitation from the ground  
 56 to the excited eigenstate  $a$  in configuration  $\mathbf{R}$  when the system interacts with a time-  
 57 dependent radiation pulse,  $P_{\mathbf{R}}(a)$ ,

$$P(a, \mathbf{R}) \propto P(\mathbf{R})P_{\mathbf{R}}(a) \quad (\text{S1})$$

58 The initial electronic wavefunction in X-SH,  $\Psi(0)$ , is then set equal to the initial active  
 59 adiabatic electronic states,  $\Psi(0)=\psi_a(0)$ . The probability  $P(\mathbf{R})$  is obtained from MD  
 60 simulation of the a6T:PDI heterojunction in the electronic ground state (see below  
 61 for details of the simulation.) To estimate the probability for transition to an excited  
 62 eigenstate  $i$ ,  $P_{\mathbf{R}}(i)$ , we write the electronic wavefunction in the eigenstate basis of the  
 63 electronic Hamiltonian  $\hat{H}(\mathbf{R})$  as:

$$\Psi(t) = \sum_{j=1}^M c_j(t) |\psi_j\rangle + c_0(t) |\psi_0\rangle \quad (\text{S2})$$

64 where  $c_j(t)$  and  $c_0(t)$  are the expansion coefficients of a given excited eigenstate,  $j$ , and  
 65 the ground state, respectively. For ease of notation the dependence of the eigenstates on  
 66  $\mathbf{R}$  is dropped. We assume that the interaction between the electric field of the pulse and  
 67 the dipoles of the PDI molecules results in a perturbative electronic coupling between  
 68 the ground state and an excited state. We also assume that the electronic transition  
 69 between the states occurs vertically. We approximate the time-dependent field of the  
 70 pulse to be a packet of classical light waves with associated angular frequencies,  $\omega$ , each  
 71 having a certain contribution to the overall wavepacket [5]. The electric field of the  
 72 pulse is then approximated by an integral over the distribution of angular frequencies,  
 73 and the distribution itself is assumed to be Gaussian around a central frequency:

$$E(t) = \mathbf{e} \frac{1}{2} \int d\omega E_0(\omega) [e^{i\omega t} + e^{-i\omega t}] \quad (\text{S3a})$$

$$E_0(\omega) = E_{\max} (2\pi\sigma_\omega^2)^{-1/2} e^{\frac{(\omega-\omega_c)^2}{2\sigma_\omega^2}} \quad (\text{S3b})$$

74 where the polarisation vector is given by  $\mathbf{e}$ , the frequency distribution is given by  
 75  $E_0(\omega)$ , and the sum of the  $\exp(\pm i\omega t)$  terms corresponds to the wave equation. We  
 76 take the assumption that all waves comprising the pulse are parallel in  $\mathbf{e}$ , which is  
 77 often the case in laser pulses [5]. The maximum electric field of the pulse is given  
 78 as  $E_{\max}$ . The central frequency and standard deviation of the Gaussian distribution  
 79 are  $\omega_c$  and  $\sigma_\omega$ , respectively. The pre-exponential factor of the  $E_0(\omega)$  term in Eq. S3  
 80 is the normalisation constant of the Gaussian frequency distribution. By substituting  
 81 Eq. S3b into Eq. S3a and evaluating the Fourier transform, one obtains the Gaussian  
 82 pulse in the time domain:

$$E(t) = \frac{\mathbf{e}E_{\max}}{2} e^{\frac{-t^2}{2\sigma_t^2}} [e^{i\omega_c t} + e^{-i\omega_c t}] \quad (\text{S4})$$

83 where  $\sigma_t$  is the standard deviation of the Gaussian distribution in the time domain.  
 84 The pulse couples the ground and excited eigenstates through the interactions of its  
 85 electric field with the total molecular dipole moment of the system, given by the vector  
 86 operator  $\hat{\boldsymbol{\mu}}_{\text{tot}}$ . We take this as a time-dependent perturbation that can be written as:

$$V_{i \leftarrow 0}(t) = \frac{1}{2} E_{\max} \langle \psi_0 | \mathbf{e} \cdot \hat{\boldsymbol{\mu}}_{\text{tot}} | \psi_i \rangle e^{\frac{-t^2}{2\sigma_t^2}} [e^{i\omega_c t} + e^{-i\omega_c t}]. \quad (\text{S5})$$

Through treating the pulse as a time-dependent perturbation to the first order that decays to zero sufficiently fast with time, it can be shown that the expansion coefficient of a single excited eigenstate after the pulse is [6]:

$$c_i(t = \infty) = -\frac{i}{\hbar} \int dt e^{i\omega_{i \leftarrow 0} t} V_{i \leftarrow 0}(t) \quad (\text{S6})$$

where  $\omega_{i \leftarrow 0}$  is the angular frequency of the  $i \leftarrow 0$  electronic transition. By substituting Eq. S5 into Eq. S6 and evaluating the resulting Fourier transforms, we obtain the following expression for the expansion coefficient of eigenstate  $i$ :

$$c_i(t = \infty) = \frac{\sqrt{\pi} E_{\max}}{\sqrt{2} \hbar \sigma_{\omega}} \langle \psi_0 | \mathbf{e} \cdot \hat{\boldsymbol{\mu}}_{\text{tot}} | \psi_i \rangle \left[ e^{\frac{(\omega_{i \leftarrow 0} - \omega_c)^2}{2\sigma_{\omega}^2}} + e^{-\frac{(\omega_{i \leftarrow 0} - \omega_c)^2}{2\sigma_{\omega}^2}} \right] \quad (\text{S7})$$

where the two Gaussian distributions of the angular frequencies  $\omega_{i \leftarrow 0}$  and  $\omega_c$  are derived from the Fourier transform of the time-dependent coupling term,  $V_{i \leftarrow 0}(t)$ , in Eq. S6, where the phase factor is given by  $e^{i(\pm\omega_{i \leftarrow 0} - \omega_c)t}$ . The latter term in the square brackets of Eq. S7 is typically neglected through the rotating wave approximation, which asserts that high frequency terms integrate to (almost) zero. In this case, the latter term corresponds to a high angular frequency, as  $\omega_{i \leftarrow 0} > 0$  in photon absorption. By squaring Eq. S7, we obtain the relative probability of the pulse accessing eigenstate  $i$  from the ground state at a fixed nuclear configuration ( $\mathbf{R}$ ) [6]:

$$P_{\mathbf{R}}(i) = |c_i(t = \infty)|^2 = \frac{\pi E_{\max}^2}{2 \hbar^2 \sigma_{\omega}^2} |\langle \psi_0 | \mathbf{e} \cdot \hat{\boldsymbol{\mu}}_{\text{tot}} | \psi_i \rangle|^2 e^{\frac{(\omega_{i \leftarrow 0} - \omega_c)^2}{\sigma_{\omega}^2}} \quad (\text{S8})$$

To estimate the transition dipole moment associated with the  $i \leftarrow 0$  transition, we express the excited eigenstate  $i$  in the diabatic basis,  $|\psi_i\rangle = \sum_{k=1}^{M_A} U_{ki}^{\text{XT}} |\phi_k^{\text{XT}}\rangle + \sum_{m=1}^{M_D} \sum_{n=1}^{M_A} U_{(mn)i}^{\text{CT}} |\phi_{mn}^{\text{CT}}\rangle$ , where the expansion coefficients  $U_{ki}^{\text{XT}}$  and  $U_{(mn)i}^{\text{CT}}$  are the elements of the unitary matrix transforming from the adiabatic to the diabatic states. This gives for the transition dipole moment:

$$\langle \psi_0 | \mathbf{e} \cdot \hat{\boldsymbol{\mu}}_{\text{tot}} | \psi_i \rangle = \langle \psi_0 | \mathbf{e} \cdot \hat{\boldsymbol{\mu}}_{\text{tot}} | \sum_{k=1}^{M_A} U_{ki}^{\text{XT}} |\phi_k^{\text{XT}}\rangle + \sum_{m=1}^{M_D} \sum_{n=1}^{M_A} U_{(mn)i}^{\text{CT}} |\phi_{mn}^{\text{CT}}\rangle \rangle \quad (\text{S9})$$

$$\approx \langle \psi_0 | \mathbf{e} \cdot \hat{\boldsymbol{\mu}}_{\text{tot}} | \sum_{k=1}^{M_A} U_{ki}^{\text{XT}} |\phi_k^{\text{XT}}\rangle \rangle \quad (\text{S10})$$

$$\approx \sum_{k=1}^{M_A} U_{ki}^{\text{XT}} \mathbf{e} \cdot \boldsymbol{\mu}_k \quad (\text{S11})$$

$$\approx \sum_{k=1}^{M_A} U_{ki}^{\text{XT}} \mathbf{e} \cdot \sum_{K \in k} q_K^{\text{T}} \mathbf{R}_K. \quad (\text{S12})$$

In Eq. S10 the small contribution of CT states is neglected, in Eq. S11 the total transition dipole is approximated by a sum of molecular transition dipoles for the S1  $\leftarrow$  S0 transition of PDI molecules and in Eq. S12 the molecular transition dipole is

approximated by the atomic transition charges ( $q_K^T$ ), similarly to the calculation of excitonic couplings, Eq. 12 main text. A similar approach for the calculation of the transition dipole moment was taken in Ref. [7]. The exponential term in Eq. S8 denotes the probability of a photon with the requisite frequency for the  $i \leftarrow 0$  transition, which can be calculated with the knowledge of the energy of the excited eigenstate relative to the ground state.

**Simulation details.** To obtain  $P(\mathbf{R})$  we sampled 1000 geometries (every ps) from a 1 ns classical NVE run of the neutral ground state of the a6T:PDI interface at 300 K, where we used the GAFF [8] force-field for neutral a6T and PDI molecules. In regard with the calculations of  $P_{\mathbf{R}}(i)$ , we note that Eq. S8 cannot be directly applied to the electronic Hamiltonian calculated in X-SH because according to Eqs. 9 and 11 in the main text the site energies of diabatic states are expressed relative to the interfacial CT-state, not the ground state. Therefore, we calculate the relative energy of the excited eigenstates of  $\hat{H}(\mathbf{R})$  by shifting the diagonal elements of  $\hat{H}(\mathbf{R})$  such that the exciton site energies will equal the vertical S1  $\leftarrow$  S0 transition energy of a gas-phase PDI molecule in its minimum energy configuration in the ground state ( $\mathbf{R}_{\text{GS}}$ ). This means that the site energy of the exciton corresponds to the S1 energy relative to S0 plus the energy for displacing the nuclei from  $\mathbf{R}_{\text{GS}}$  to  $\mathbf{R}$ . This holds for the CT site energies as well, as their lower electronic energy (relative to the exciton) is already incorporated into the expression for the site energy of the exciton before we apply this linear shift. To this end, we extracted a single PDI molecule from the crystal structure of the a6T:PDI junction and optimised it in its neutral ground state (B3LYP, 6-31G(d,p)). We then performed a TDDFT calculation (CAM-B3LYP, 6-31G(d,p)) to obtain the energy of the first excited state (2.75 eV). We calculated the (site-energy shifted) electronic Hamiltonian of each sampled nuclear configuration, and then diagonalised it to obtain its resulting eigenstates. Our electronically active region is a 1-dimensional chain of 20 a6T and 20 PDI molecules, which results in 420 localised quasi-diabatic states constituting the electronic state space. Therefore, sampling 1000 geometries results in an ensemble of 420,000 possible excited eigenstates. We then calculated the transition dipole moment associated with each eigenstate by passing the atomic coordinates of the PDI molecules into Eq. S12. To visualise the distribution of the transition dipole moments of the eigenstates, hereafter referred to as  $\mu_{\text{Tr}}$ , we sorted the eigenstates in the ensemble into 200 energy bins and then calculated the average  $\mu_{\text{Tr}}$  of each energy bin. In Fig. S1a, we have plotted the average  $\mu_{\text{Tr}}$  as a function of eigenstate energy (relative to the neutral ground state in  $\mathbf{R}_{\text{GS}}$ ) for the electronic Hamiltonian of simulation (1) in Table 2 of the main text. As shown in Fig. S1a, we have chosen the central wavelength of the pulse such that it maximally overlaps with the peak of  $\mu_{\text{Tr}}$ . We have calculated the pulse width by following the procedure outlined in Ref.[9], where the uncertainty associated with the temporal pulse length and frequency width is given by  $\Delta\omega\Delta t = 1/2$ . We have set  $\Delta t = 10$  fs, which is a pulse length that can be achieved using commercial spectroscopy equipment. The same strategy was used to determine the initial conditions for all other simulations (2)-(7) in Table 2 in the main text. After obtaining the ensemble of possible eigenstates, we calculated the relative excitation probability of each eigenstate

153 by inserting its transition frequency and transition dipole moment into Eq. S8 and re-  
 154 normalising the probability obtained from each eigenstate. The initial eigenstates (and  
 155 underlying nuclear configurations) of the 500 X-SH trajectories were then randomly  
 156 sampled from the ensemble, with the sampling weighted by the eigenstates' excita-  
 157 tion probabilities. The histogram of the energies of initial eigenstates selected for the  
 158 unmodified heterojunction (simulation (1) in Table 2 main text) is shown in Fig. S1b,  
 159 and is overlayed with the average excitation probability of 200 energy bins of possible  
 160 eigenstates. As expected, the energy distribution of eigenstates, which were selected  
 161 with the procedure outlined above, follows the excitation probability as a function of  
 162 eigenstate energy. Fig. S1c breaks down the total  $\mu_{\text{Tr}}$  shown in panel a into the con-  
 163 tributions of eigenstates categorised as XT, CT or hybrid XT-CT, where each state  
 164 contribution has been independently renormalised to render the curves comparable.  
 165 The eigenstates have been categorised with the procedure outlined in the main text.  
 166 The similarity in shape between the XT contribution and total  $\mu_{\text{Tr}}$  indicates that XT  
 167 eigenstates typically have the highest transition dipole moment, with the peak in  $\mu_{\text{Tr}}$   
 168 coinciding with the upper edge of the XT band (Fig. 2a, main text). The peak of the  
 169 CT states' contribution to the total  $\mu_{\text{Tr}}$  coincides with the energies of the iCT states,  
 170 as these are most likely to hybridise with XT states in simulation (1), as shown by  
 171 Fig. 3 in the main text.

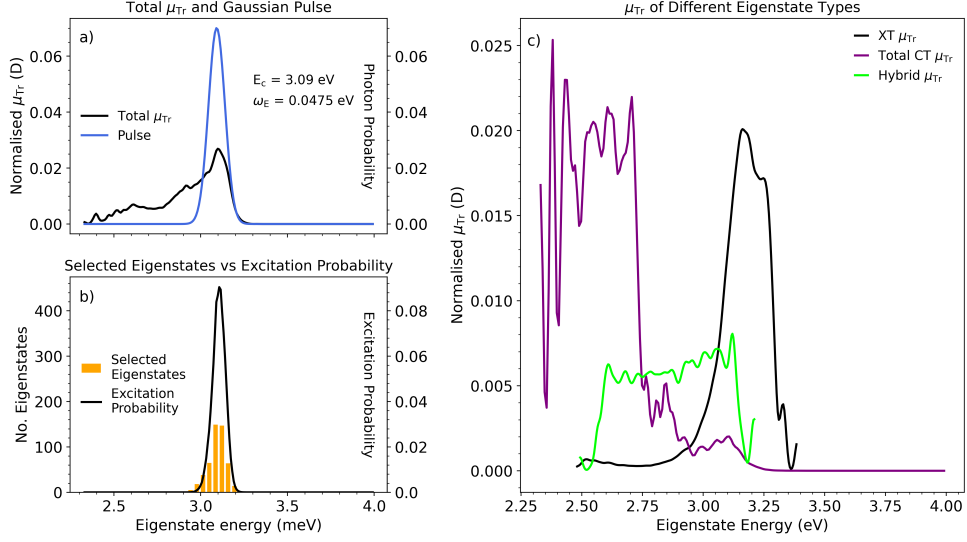

**Fig. S1** Plot of the exciting Gaussian pulse and  $\mu_{Tr}$  against energy, and then the resulting transition probability against eigenstate energy. The black curve in (a) plots the binned eigenstate energy (relative to the neutral ground state) against  $\mu_{Tr}$  of each bin, using an ensemble of 420,000 eigenstates obtained from diagonalising the electronic Hamiltonians of an ensemble of 1000 nuclear configurations, which were sampled from a 1 ns NVE run in the neutral ground state. The blue curve is the plot of the exciting (10 fs) Gaussian pulse in the energy domain, where the central wavelength has been selected to maximally overlap with the peak of  $\mu_{Tr}$ . The annotations  $E_c$  and  $\omega_E$  denote the central pulse energy and standard deviation, respectively. The orange histogram in panel (b) displays the distribution of 500 selected eigenstate energies for simulation (1), sampled from the aforementioned ensemble of eigenstates. The black curve shows the excitation probability of the total eigenstate ensemble as a function of its energy, when the ensemble has been collected into 200 energy bins, with each bin having an average excitation probability. Each curve in panel (c) shows the transition dipole moments obtained from only considering the XT (black), hybrid XT-CT (lime), and CT (purple) eigenstates.

### 172 S3 Exciton binding energy

173 The exciton binding energy ( $E_b$ ), as defined in Eq. 24 of the main text, is a key  
 174 parameter that illuminates the relative energetics of XT and CS states in a given  
 175 system. Each term in the expression for ( $E_b$ ) is usually defined with respect the neutral  
 176 ground state, but can also be defined with respect to any other energetic baseline. In  
 177 this case, we express the optical gap ( $E_g^{\text{opt}}$ ) and the transport gap ( $E_t$ ) with respect to  
 178 the iCT state at  $\mathbf{R}_{\text{GS}}$ . The energy of the uncorrelated electron hole pair with respect  
 179 to the iCT state at  $\mathbf{R}_{\text{GS}}$  is equal to the limit of the Coulomb interaction (with no field)  
 180 at infinite distance, as there are no thermal fluctuations affecting the relative energies  
 181 of different CT states.  $E_g^{\text{opt}}$  can be estimated by taking the lowest eigenstate energy  
 182 when the total eigenstate excitation probability (plotted in Fig. S1b) is non-zero. To  
 183 express this eigenstate energy with respect to the iCT state at  $\mathbf{R}_{\text{GS}}$ , we subtract the  
 184 eigenstate energy by the iCT energy at  $\mathbf{R}_{\text{GS}}$ , which is given as the S1 excitation energy  
 185 of a PDI molecule (2.75 eV) subtracted by the XT-CT energetic offset (defined as  $\epsilon^{\text{XT}}$   
 186 in the main text) at  $\mathbf{R}_{\text{GS}}$ . Therefore, after expressing each term with respect to the  
 187 iCT state, we insert them into Eq. 24 of the main text to obtain an estimate for  $E_b$ .  
 188 For simulation (1),  $E_{\text{opt}} = 565$  meV; this value will remain similar for a given value  
 189 of  $\epsilon_r$  and different electronic couplings between CT states, since the peak of the total  
 190  $\mu_{\text{Tr}}$  is mainly controlled by the transition dipole moments of the excitons (Fig. S1a).  
 191 This results in simulations with equal  $\epsilon_r$  and different electronic couplings displaying  
 192 small deviations in  $E_b$ .

### 193 S4 Exciton decay and charge generation for 194 simulations (1)-(7) in Table 2 main text

195 Fig. 4 in the main text displayed the time-dependent contributions of 4 different  
 196 diabatic state-types (given by  $P_{\text{XT}}$ ,  $P_{\text{iCT}}$ ,  $P_{\text{niCT}}$ , and  $P_{\text{CS}}$ , Eqs. 17-20, main text) to the  
 197 electronic wavefunction  $\Psi(t)$ , for simulations (1), (2) and (5) in Table 2. This showed  
 198 that increasing the electronic coupling between CT states or reducing  $E_b$  results in a  
 199 higher rate of exciton dissociation and charge generation (such that it can be resolved  
 200 on a 10 ps timescale). Here, Fig. S2 shows such electronic populations for simulations  
 201 (1) - (7), overlaid with the exciton decay profile obtained through the least-squares  
 202 fitting of a bi-exponential decay function (Eq. 1, main text) to  $P_{\text{XT}}$ . The electronic  
 203 populations of simulations with unmodified electronic couplings and a progressively  
 204 weaker Coulomb electron-hole interaction (simulations (1,4,7)) correspond to panels  
 205 a-c, which reaffirms that a weaker Coulomb barrier results in faster exciton decay  
 206 and charge generation, alongside a general increase in the non-interfacial character  
 207 of CT states following exciton dissociation. The increase in exciton dissociation rate  
 208 is quantified by panels f and i, which display the fitted decay constants and relative  
 209 contributions, respectively, for bulk (b) and interfacial (i) exciton dissociation types,  
 210 as delineated in Eq. 1 of the main text. A reduction in  $E_b$  from 260 to -310 meV  
 211 accelerates both dissociation types, with  $k_b$  and  $k_i$  doubling and tripling, respectively,  
 212 whilst their contributions remain approximately constant.

213 Panels d and g (simulations (2) and (3)) correspond to simulations with  $E_b =$   
 214 260 meV and progressively increased electronic couplings. Furthermore, panels e and  
 215 h (simulations (5) and (6)) display the electronic populations when  $E_b = 10$  meV  
 216 and the coupling is also strengthened. Both sets of parameter regimes indicate faster  
 217 exciton dissociation and charge generation as a result of stronger electronic coupling  
 218 between CT states, with  $P_{CS}$  actually overtaking  $P_{niCT}$  and  $P_{iCT}$  formation when an  
 219 adequate balance between electronic coupling and  $E_b$  is achieved (panels e and h). In  
 220 all cases where  $P_{CS}$  becomes significant,  $P_{iCT}$  remains comparable, since the Coulomb  
 221 interaction continues to push niCT states higher in energy. As in the case of increasing  
 222  $E_b$  without modifying the coupling, increasing the electronic coupling strength at a  
 223 given  $E_b$  results in a comparable increase in  $k_b$  and  $k_i$ , with panel i also suggesting  
 224 that a higher proportion of bulk excitons are initially excited as the CT coupling is  
 225 increased.

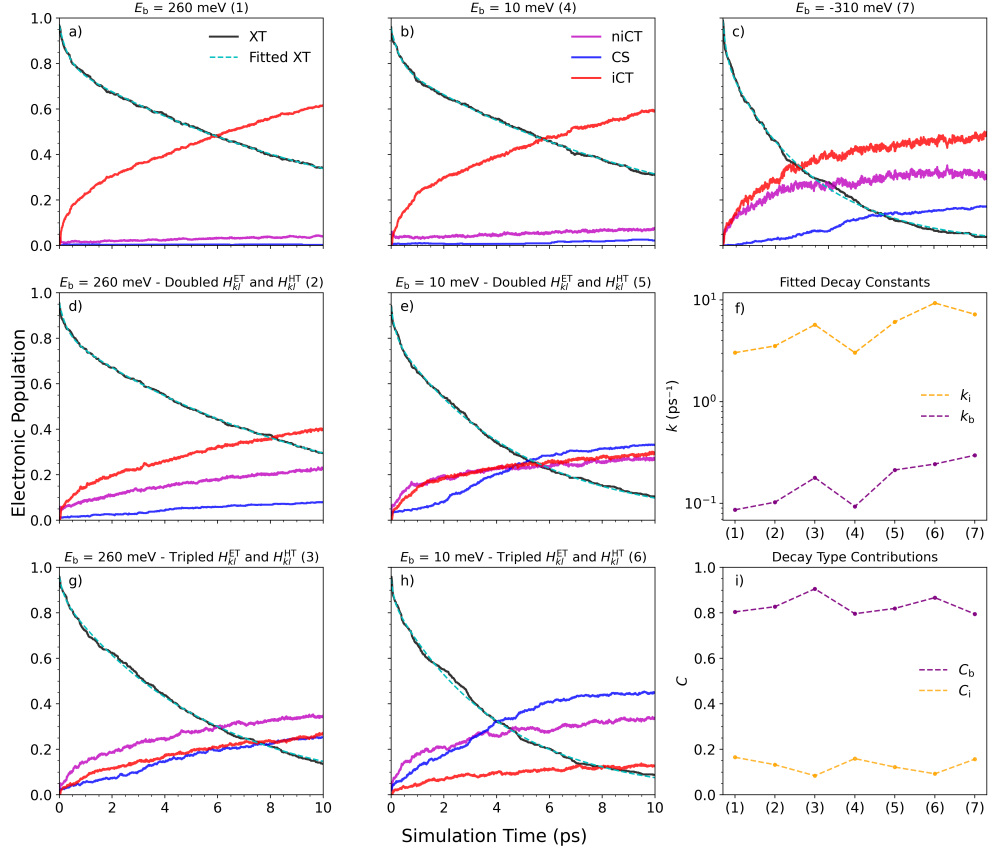

**Fig. S2** Plots of the time-dependent electronic populations of different types of quasi-diabatic states (Eqs. 17-20 in the main text),  $P_{XT}$  plots overlaid with exciton decay profiles predicted from the least-squares fitting of a biexponential decay function to the X-SH data (Eq. 1, main text). The simulation label (Table 2, main text) of each panel is included in its title. Panels (a), (b), and (c) display the populations when the electronic coupling is unmodified and  $E_b = 260$ , 10, and  $-310$  meV, respectively. Panels (d) and (f) correspond to  $E_b = 260$  meV with progressively stronger electronic couplings between CT states. Panels (e) and (g) additionally refer to  $E_b = 10$  meV with increasing couplings. Panel (f) plots the fitted decay constants associated with the dissociation of bulk and interfacial excitons obtained from least-squares fitting; the numbers on the  $x$ -axis refer to the simulation labels presented in Table 2 of the main text, which are also included in the titles of all population plots. Panel (i) displays the relative proportions of excitons initialised in the bulk region of the acceptor phase or close to the interface. The values of  $C$  were constrained during optimisation such that their sum is always equal to  $P_{XT}$  at  $t = 0$ .

## S5 Least-squares Fitting

The least-squares fitting of the electronic exciton populations  $P_{\text{XT}}$  was undertaken with the *least\_squares* function of the *scipy.optimize* [10] python module. We used an exponential decay function to compute the residuals, as we assumed that the rate of exciton decay is linearly proportional to the proportion of trajectories that are in an excitonic state at any given time. The initial guesses of the decay constants and coefficients of each exponential decay term were found through preliminary visual fitting, before being passed into the algorithm. We have used the Trust-region Reflective Algorithm [11] available within the *scipy.optimize* module with no bounds on the decay constants. We used a linear loss function, whose tolerance was set to  $10^{-8}$ . The use of a bi-exponential decay function corresponds to the assumed presence of two non-overlapping subsets of excitons in each swarm of trajectories, which are characterised by two (potentially) different decay constants. The use of a tri-exponential decay function similarly corresponds to 3 independent subsets of excitons. To validate our use of a bi-exponential decay function, we attempted to fit the exciton population of each simulation to an exponential decay function of 1, 2 and 3 decay terms, and compared their ability to account for the underlying data with their  $R^2$  values. The chosen bi-exponential decay function was outlined in Eq. 1 of the main text. However, in the fitting function passed into the fitting algorithm, the ratio(s) of coefficients was used as a fitting parameter instead of the coefficients themselves. For the decay functions with more than 1 term, we used the ratio(s) to calculate the expansion coefficients such that their sum is always equal to  $P_{\text{XT}}$  at  $t = 0$ .

Fig. S3a displays the  $R^2$  values obtained through the application of all three aforementioned decay functions. Increasing the number of terms in the decay function results in a general increase in  $R^2$ , but this becomes negligible once more than 2 exponential decay terms are included. Fig. S3b plots the decay constants associated with the monoexponential and biexponential fits, and suggests that the increased  $R^2$  value is due to the inclusion of a small subset of excitons that dissociate rapidly, likely because they are excited near the heterojunction interface and are therefore not limited by exciton diffusion. Therefore, the two subsets of excitons represented by the biexponential fit are labelled by the subscripts i (interfacial) and b (bulk), as written in Eq. 1 of the main text.

Panels c and d show the decay constants obtained by fitting the triexponential decay function to  $P_{\text{XT}}$  for each parameter regime. In addition to the  $R^2$  value, the behaviour of exciton dissociation is also broadly unaffected by the inclusion of a third decay term in the fitting process. All sets of decay constants in panel c are still similarly split into fast and slow components, with virtually no change in the constants corresponding to bulk exciton dissociation. Furthermore, the contribution of exciton dissociation from the bulk remains dominant for each parameter regime.

## S6 Exciton Dissociation Distance

Fig. 5 in the main text depicts a new secondary mechanism by which an exciton can dissociate if the coupling between CT states is large enough. This involves the exciton directly transitioning to transiently delocalised hybrid XT-CT states, which are

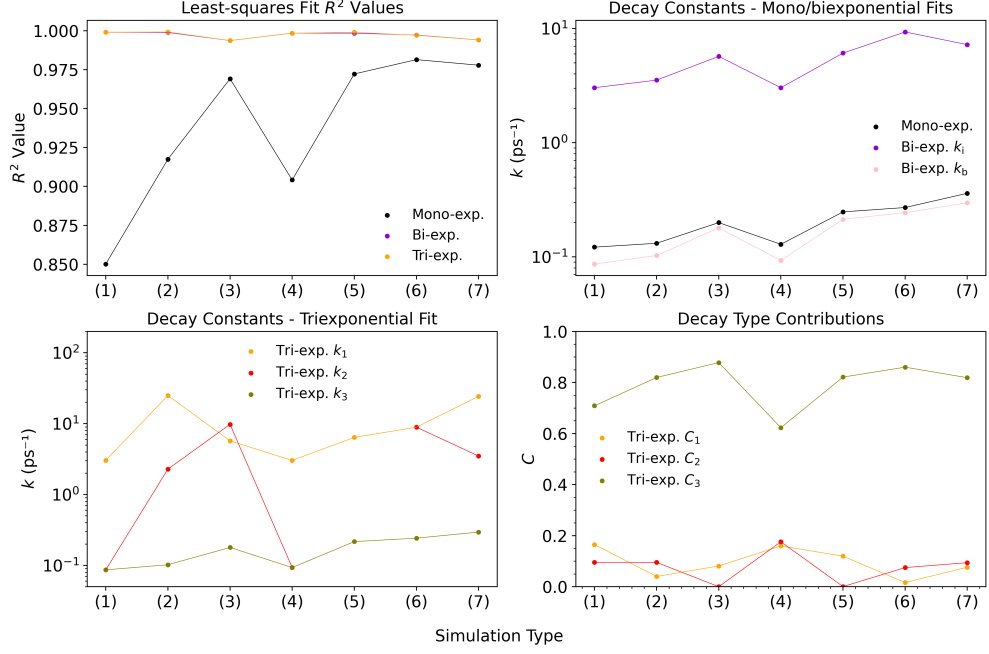

**Fig. S3** (a) Plot of  $R^2$  values obtained from the least-squares fit of exponential decay functions with 1 (black), 2 (purple), and 3 (orange) decay terms, to  $P_{\text{XT}}$  of each simulation in the main text. (b) Plot of the decay constants obtained from the least-squares fit of the 1-term and 2-term exponential decay functions. The decay constants obtained from the single exponential fit are shown in black, whilst the bulk decay constants ( $k_b$ ) obtained from the bi-exponential decay function are shown in pink, and the fast interfacial decay constants ( $k_i$ ) are shown in purple. (c) Plot of the decay constants obtained from the least-squares fit of an exponential decay function with 3 terms. The first two decay constants,  $k_1$  and  $k_2$ , are plotted in orange and red, respectively. The value of  $k_2$  is not displayed for (5) and is instead included here:  $k_2 = -0.335 \text{ ps}^{-1}$ , with its corresponding contribution to exciton dissociation being negligible. (d) Plot of the contributions of each term in the tri-exponential decay fit. The respective contributions of the  $k_1$ ,  $k_2$ , and  $k_3$  decay terms are plotted in orange, red, and green, respectively.

converted into niCT and then CS states in what we term hot exciton dissociation. To establish the statistical significance of such a pathway, we evaluate the expectation value of the exciton's displacement with respect to the interface for each X-SH trajectory, at the timestep immediately preceding the onset of exciton dissociation. For a given X-SH trajectory, we track  $P_{\text{XT}}$  (Eq. 17, main text) throughout the 10 ps dynamics and obtain the timestep before which  $P_{\text{XT}}$  decreases below 0.95, given that  $P_{\text{XT}}$  then subsequently decreases below 0.05 and then stays below 0.5 for the next 500 fs. For a single trajectory, the time-dependent expectation value of the exciton distance (with respect to the interface) is defined as

$$r_{\text{XT}}^{\text{rel}}(t) = \langle \Psi(t) | \hat{r}^{\text{rel}} | \Psi(t) \rangle \approx \frac{\sum_{k=1}^{M_{\text{XT}}} |u_k^{\text{XT}}(t)|^2 (x_{k,0}^{\text{PDI}} - x_{\text{int}})}{\sum_{k=1}^{M_{\text{XT}}} |u_k^{\text{XT}}(t)|^2} \quad (\text{S13})$$

278 where  $\hat{r}^{\text{rel}}$  refers to the Euclidean distance between the cartesian coordinates of the  
 279 centre of the excitation density and the midpoint between the interfacial a6T and  
 280 PDI molecules,  $r_{\text{int}}$ . The expectation value of this distance is equivalent to the sum  
 281 of individual PDI molecules' centres of mass with respect to  $r_{\text{int}}$ , weighted by the  
 282 squared coefficients of the corresponding quasi-diabatic XT states. Each coefficient has  
 283 been renormalised to remove the impact non-zero CT state amplitudes may have on  
 284  $r_{\text{XT}}^{\text{rel}}(t)$ . Since the electronically active region extends across a single crystallographic  
 285 ( $a$ ) direction, the centre of mass distances of the PDI molecules with respect to  $r_{\text{int}}$   
 286 are equivalent to their distances solely along the  $x$ -axis,  $x_{k,0}^{\text{PDI}} - x_{\text{int}}$ . We approximate  
 287 the  $x$ -coordinate of each PDI molecule at time  $t$  as its initial coordinate at  $t = 0$ ,  
 288  $x_{k,0}^{\text{PDI}}$ , since the geometric centres of the upper / lower rings of each molecule are  
 289 constrained throughout the dynamics. Fig. S4 therefore displays the distributions of  
 290 exciton distances upon dissociation for each simulation in the main text. The exciton  
 291 distances are divided into 3 bins: 5-35Å, 35-65Å, and 65-95Å. The height of each bar  
 292 denotes the number of trajectories with excitons dissociating within the respective  
 293 distance bin, whilst the coloured section of each bar denotes the proportion of exci-  
 294 tons in this bin that have relaxed into a given final state after 10 ps. Panels a-c show  
 295 the exciton distance distributions as the Coulomb interaction is progressively weak-  
 296 ened without the coupling between CT states being modified (simulations (1,4,7)).  
 297 As the Coulomb interaction weakens, both hot and cold exciton dissociation path-  
 298 ways are resolved within 10 ps, with an increasing proportion of excitons relaxing  
 299 into higher-energy niCT states, which are either accessed directly from the exciton  
 300 or after dissociation into an iCT state. Crucially, the notably faster exciton decay  
 301 at  $E_{\text{b}} = -310$  meV compared to 260 and 10 meV, is due to  $\approx 30\%$  of excitons now  
 302 dissociating more than 3.5 nm away from the interface, thereby mitigating the rate-  
 303 limiting nature of exciton diffusion. Panels d, and f correspond to the exciton distance  
 304 distributions when  $E_{\text{b}} = 260$  meV and the electronic coupling is doubled and tripled,  
 305 respectively (simulations (2) and (3)). Panels e, and g display distributions with the  
 306 same coupling pattern with  $E_{\text{b}} = 10$  meV (simulations (5) and (6)). In both cases, an  
 307 increase in electronic coupling strength results in increasingly non-interfacial exciton  
 308 dissociation and hot exciton dissociation, with a reduction in  $E_{\text{b}}$  continuing to facil-  
 309 itate both phenomena at higher couplings. In each simulation, excitons dissociating  
 310 further from the interface are more likely to access the CS state after 10 ps. This may  
 311 occur because non-interfacial XT states are relatively more likely to transition to delo-  
 312 calised hybrid XT-CT states with non-interfacial XT (and therefore niCT, see Fig. S8)  
 313 character, compared to XT states centred closer to the interface, which are more likely  
 314 to strongly couple to CT states also centred around the interface. The non-interfacial  
 315 CT character of such delocalised hybrid states renders them more likely to directly  
 316 transition to niCT and then CS states, completing the hot dissociation pathway.

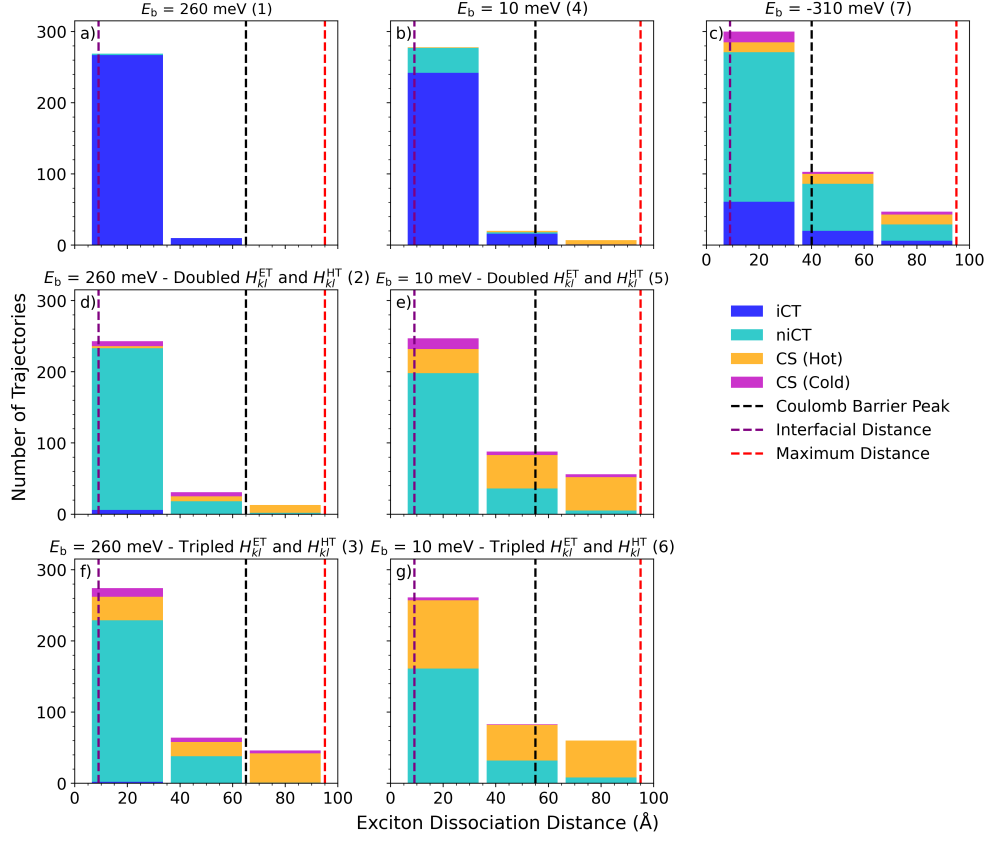

**Fig. S4** Plots of distributions of exciton distances with respect to the aT6:PDI interface immediately preceding exciton dissociation, and the fraction of excitons relaxing to iCT, niCT or CS states following dissociation. Panels (a), (b), and (c) display such distributions when the electronic coupling between CT states is unmodified and  $E_b = 260$ , 10, and  $-310$  meV, respectively. Panels (d) and (f) correspond to  $E_b = 260$  meV with progressively stronger electronic couplings between CT states. Panels (e) and (g) refer to  $E_b = 10$  meV with increased CT couplings as well. Different coloured sections within the bar of a given distance bin denote the proportion of excitons in this bin that have relaxed into a certain electronic CT state (iCT, niCT, CS) after 10 ps. The dotted purple and red vertical lines refer to the interfacial and boundary PDI distances, respectively. The black dotted line denotes the electron-hole distance of the Coulomb barrier peak for a given  $E_b$ .

## S7 Exciton Relaxation Pathways

Fig. 5 in the main text indicates that, upon increasing the electronic coupling between CT states (or reducing  $E_b$ ), a new common trajectory emerges that displays non-interfacial hot exciton dissociation. This is further indicated by the average active eigenstate increasing in energy following exciton dissociation, as well as the electronic niCT population increasing (Fig. 4, main text). Additionally, the pathways taken by each trajectory as the exciton relaxes can be assessed by tracking  $\Psi(t)$  each timestep over the course of the X-SH dynamics. Each timestep,  $\Psi(t)$  is categorised as one of the 5 states used in the main text to classify the eigenstates of the electronic Hamiltonian (XT, iCT, niCT, CS, hybrid XT-CT). Then the identity of  $\Psi(t)$  is known for each timestep of a trajectory, and the relaxation pathway the exciton in a trajectory takes is determined by the identity of  $\Psi(t)$  at 10 ps and the electronic states occupied during the rest of the trajectory. We categorise the evolution of  $\Psi(t)$  into 6 general pathways, where Fig. S5 shows the percentage of (dissociated) trajectories accessing each pathway, for different electronic couplings and values of  $E_b$ . Panel a indicates that, as  $E_b$  is reduced, both hot and cold exciton dissociation pathways (pathways 6 and 5 in Fig. S5, respectively) occur on the 10 ps timescale and a larger proportion of excitons are dissociating directly into niCT states. Panels b and c reiterate this trend when the electronic coupling is increased at  $E_b = 260$  meV or  $E_b = 10$  meV, respectively. The hot pathway begins to dominate over the cold pathway and increasingly fewer excitons are accessing niCT states via the iCT state first; this is due to the fact that increasing the CT coupling magnitude delocalises the charge carriers to a larger extent compared to an isolated reduction in  $E_b$ . However, an important point to consider is that  $\Psi(t)$  is classified as an iCT state only if  $P_{iCT} > 0.8$  at time  $t$ . As the charge carrier delocalisation increases, this criterion is less likely to be satisfied even if the electron-hole pair is located close to the interface (such that  $P_{iCT}$  is still close to 0.8). This will therefore result in the contribution of the cold pathway being slightly underestimated as the electronic coupling is increased. However, the bulk of excitons dissociating via the hot pathway likely proceed via niCT states centred nanometres away from the interface, since the average electron-hole distance of the hybrid states' CT components increases by over 2 nm as the electronic coupling is increased (Fig. S7b).

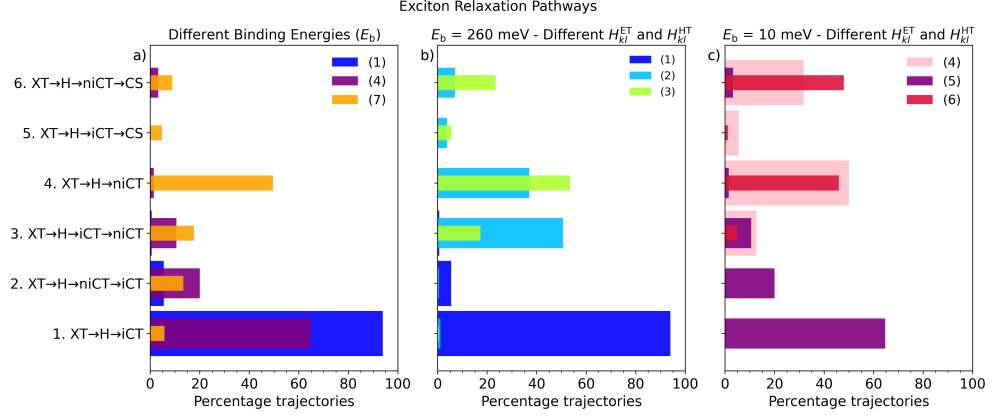

**Fig. S5** Plots of the percentage of dissociated excitons that relax via 6 general pathways in X-SH. The effect on the pathways taken due to a weaker electron-hole Coulomb attraction (hence smaller  $E_b$ ) is shown in (a). Panels (b) and (c) display this effect for increasing the electronic coupling between CT states, when  $E_b = 260$  meV and  $E_b = 10$  meV, respectively. The pathways denote the following: 1. Relaxation of exciton directly to iCT. 2. Dissociation of exciton to niCT, which then relaxes to iCT. 3. Exciton dissociates into iCT, then carriers reach the niCT state. 4. Exciton directly dissociates into niCT. 5. CS state reached after exciton directly dissociates into iCT which then surmounts the coulomb barrier - charge generation via cold exciton dissociation. 6. Exciton dissociates into niCT state which transitions to CS without relaxing to iCT - charge generation via hot exciton dissociation.

## S8 Characterisation of Hybrid XT-CT State

In the main text, Fig. 3 (and Fig. S5) showed that the hybrid XT-CT state is an essential intermediate between pure XT and CT states. Increasing the electronic coupling between CT states or reducing  $E_b$  further demonstrated that, as more delocalised hybrid states become thermally accessible, they become the gateway to the hot, non-interfacial exciton dissociation. We therefore examine more closely how changes in the aforementioned parameters can affect the extent of delocalisation and non-interfacial character of hybrid XT-CT states.

As the hybridisation of  $\Psi(t)$  is due to the occupancy of an active eigenstate with hybrid XT-CT character, we construct a representative distribution of hybrid eigenstates in each simulation. We sample the eigenstates of  $\hat{H}(\mathbf{R})$  of each trajectory every 10 timesteps, and only select the eigenstates that satisfy the criterion for a hybrid XT-CT state, as outlined in the main text. For each simulation, the resulting ensemble of hybrid eigenstates was then organised into bins of electron-hole distance of the CT component, which range from 0 to 12 nm in increments of 2 nm. The electron-hole distance of a given state was calculated with Eq. S13 but replacing the Euclidean distance between the exciton and the interface with the Euclidean distance between the electron and hole, and renormalising with respect to CT populations. The IPR of each hybrid XT-CT state was calculated with Eqs. 21-23 in the main text, with the mean IPR of all states within a given distance bin being calculated subsequently. The mean exciton IPR values of the hybrid eigenstates, whose electron-hole distances fall into a given bin, are plotted in Fig. S6a, where the  $x$ -coordinate of each point corresponds to the midpoint of a distance bin. The electron-hole distance bins were truncated to 12 nm or 8 nm, depending on the simulation, despite the maximum possible electron-hole distance being just under 2 nm. This is due to the number of hybrid XT-CT states with electron-hole distances above these 2 cutoffs being insufficient for a converged IPR. Figs. S6b and S6c show the same plot, but for electron and hole IPR, respectively.

Fig. S6 indicates that the XT and CT contributions to hybrid XT-CT states become more delocalised as the CT contribution becomes centred away from the interface. This suggests that increased hybrid state delocalisation is more likely to result in direct transitions to niCT states, and then CS states. We notice that the hole IPR (Fig. S6c) begins to decrease once the electron-hole distance is sufficiently large. This is likely due to the hole, which is delocalised on  $\approx 3$  more molecules than the electron at this distance, being constrained by the heterojunction boundary once it is sufficiently far from the interface.

Although more delocalised hybrid XT-CT states are more likely to directly transition into niCT states (per Fig. S6), such eigenstates must then become more abundant or thermally accessible as the electronic coupling is increased, to explain the hybrid states' role in increasing the CS yield (see Table 2, main text). Fig. S7a displays the average exciton IPR calculated from the full hybrid state distribution sampled from X-SH runs (1) - (7). The exciton IPR indeed increases alongside the electronic coupling (or reduction in  $E_b$ ), which suggests that the average hybrid XT-CT state does exhibit more delocalisation and is hence more likely to transition to niCT states and undergo hot exciton dissociation. Similarly, the average electron-hole distances obtained from

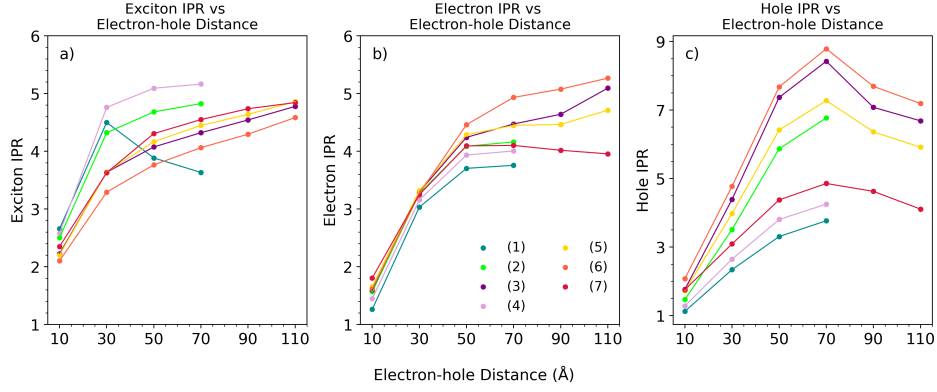

**Fig. S6** Plots showing the relationship between the particle IPR of a given hybrid XT-CT state and the electron-hole distance of its CT component. (a) Plot of exciton IPR of hybrid XT-CT eigenstates as a function of electron-hole distance, calculated by sorting an ensemble of sampled hybrid eigenstates into 2nm-wide bins, and calculating the mean exciton IPR of the hybrid XT-CT states within each bin. (b) Plot of hybrid state electron IPR as a function of electron-hole distance, using the same procedure as that for (a). (c) Plot of hybrid state hole IPR as a function of electron-hole distance.

the full hybrid state distributions (Fig. S7b) depict the same trend, consistent with relationship between IPR and electron-hole distance illustrated in Fig. S6.

It was shown in Fig. S4 that excitons dissociating away from the interface are more likely to undergo the hot dissociation pathway. Fig. 5 in the main text also indicates that the XT component of the transient hybrid state has significant amplitude away from the interface. These two factors suggest that hybrid states with non-interfacial XT components are also more likely to have non-interfacial CT components. We therefore calculate the exciton distance (with respect to the interface) of each sampled hybrid XT-CT eigenstate with Eq. S13 and partition the ensemble of hybrid states into 3 distance bins: 5-35Å, 35-65Å, and 65-95Å. For the subset of hybrid states within each distance bin, we then calculate the average electron-hole distance. We carry out this procedure for simulations with a significant CS yield, namely (3) and (5) - (7), the result of which is plotted in Fig. S8. Indeed, the average electron-hole distance (of the hybrid state CT components) increases alongside the exciton distance, which suggests that hybrid states with more non-interfacial XT contributions are more likely to directly transition to niCT states, and then CS states.

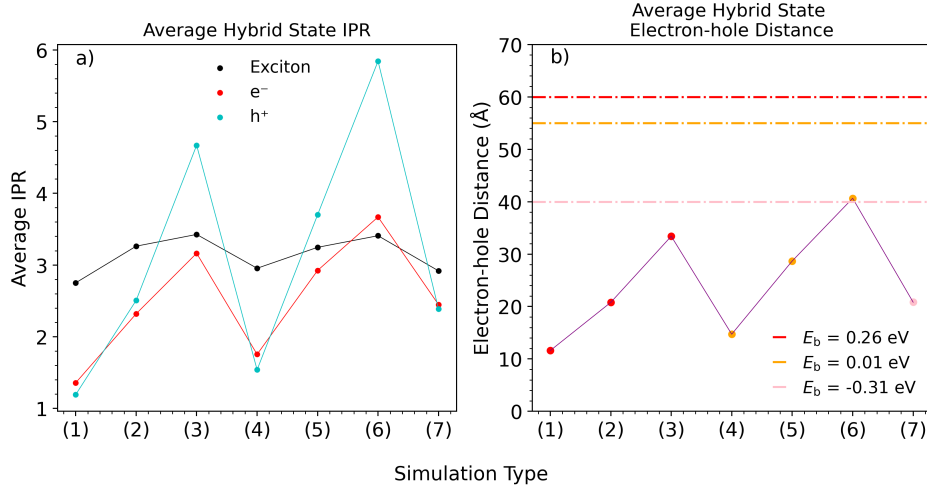

**Fig. S7** Plot of the mean particle IPR of all sampled hybrid XT-CT states from simulations (1) - (7). **(a)** Mean exciton, electron, and hole IPR, calculated from an ensemble of sampled hybridised eigenstates during the dynamics of simulations (1) - (7). **(b)** Mean expectation values of the hybrid states' electron-hole distance, calculated for simulations (1) - (7). The dash-dotted horizontal lines correspond to the electron-hole distances of the coulomb barrier peaks for exciton binding energies of 0.26 eV (red), 0.01 eV (orange), and  $-0.31$  eV (pink). This shows that the hybrid states' CT-state components become energetically closer to the coulomb barrier peak as the electron-hole distance increases, which makes the hot pathway more thermally accessible. The coloured dots on the purple line denote the values of  $E_b$  of each simulation accordingly.

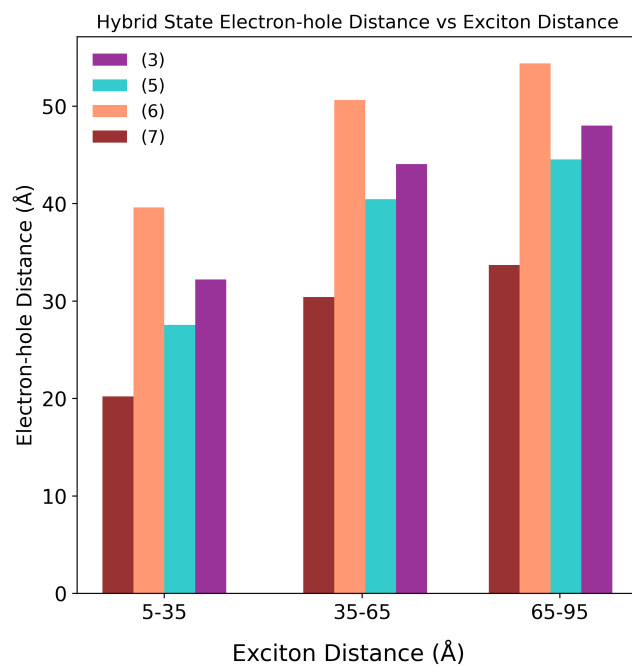

**Fig. S8** Plot of the electron-hole distance of hybrid XT-CT states as a function of the states' exciton distance with respect to the interface. This was calculated by binning a ensemble of hybridised eigenstates, sampled during the dynamics of simulations (3) and (5) - (7), by their expectation values of the exciton distance, and then calculating the mean electron-hole distance of the hybrid states within each exciton distance bin.

## S9 Analysis of non-adiabatic couplings involving hybrid XT-CT states

In addition to the density of thermally accessible states, the probability of a transition from an active eigenstate to an niCT state is linearly proportional to the non-adiabatic coupling element (NACE) between the two states. The non-adiabatic coupling refers to the electronic coupling between two eigenstates of the electronic Hamiltonian at a given nuclear geometry, as the thermal motion of the nuclei (with time) changes the electronic structure of the system and its resultant eigenstates. This is distinct from the aforementioned electronic coupling, which we have used to refer to the off-diagonal matrix elements between localised electronic states of the electronic Hamiltonian in the quasi-diabatic basis. The NACE between an active eigenstate, labelled  $a$ , and state  $j$  is defined as  $d_{ja}^{\text{adiab}} = \langle \psi_a | \frac{\partial}{\partial t} | \psi_j \rangle$ . The NACE is also inversely proportional to  $\Delta E_{ja}$ , which is the potential energy difference between states  $a$  and  $j$  [12]. The NACE is proportional to the overlap between the active eigenstate and the time-derivative of another state  $j$ , which becomes non-zero if state  $j$  evolves such that there is a common region of excitation density between the two states - this was shown to be crucial in the transitions from non-interfacial XT to hybrid XT-CT states. Hybrid XT-CT states with more niCT character are more likely to facilitate non-interfacial exciton dissociation, and transition into pure niCT states, which are the precursors to CS states. We therefore focus on the NACEs between XT and hybrid XT-CT states, and between hybrid XT-CT states and pure CT states (iCT, niCT and CS). Due to the NACE being inversely proportional to  $\Delta E_{ja}$ , we anticipate that it should generally decrease as hybrid or CT states are centred further from the interface. To account for the joint effect of higher NACEs and density of accessible states, we calculate the sum of Boltzmann-weighted NACEs between a given initial and final state-type, averaged over all trajectories and timesteps of each simulation in this work. The sum of Boltzmann-weighted NACEs between a given currently occupied state,  $a$ , and a subset,  $b$ , of possible future states, for a single timestep, is defined as:

$$D_{ba} = \sum_{j \in b} d_{aj}^{\text{adiab}} e^{\frac{-\Delta E_{ja}}{k_B T}} \quad (\text{S14})$$

where  $j$  refers to a state within subset  $b$ , and the exponential term in each element of the NACE sum  $D_{ba}$  is the thermal weighting applied to each NACE term within the subset of possible future states.

In Fig. S9a, we plot the thermally averaged  $D_{ba}$  for the transition between an initial XT state, and different sets of hybrid XT-CT states resolved by their expectation value of the electron-hole distance, as calculated in Section S8. As expected,  $D_{ba}$  decreases alongside electron-hole distance for all parameter regimes, due to the higher energy of niCT states. Crucially, the gradient of descent is significantly reduced as the electronic coupling is increased or  $E_b$  reduced. For example, the difference in  $D_{ba}$  between simulations (1) and (5), where (5) exhibits a lower  $E_b$  and stronger electronic coupling than (1), reaches an order of magnitude when the electron-hole distance of the hybrid XT-CT state exceeds 2 nm. The minimum distance bin, corresponding to hybrid XT-CT states with electron-hole distances between 1 nm and 2 nm, remains

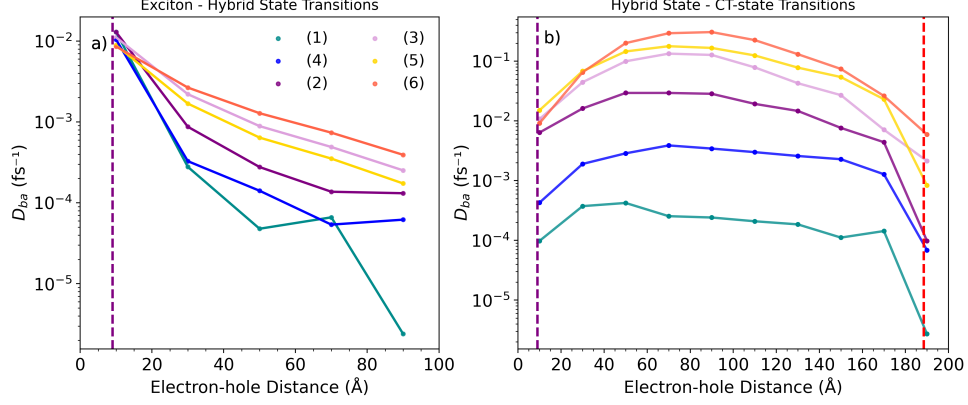

**Fig. S9** Plots of the sums of Boltzmann-weighted NACEs ( $D_{ba}$ ) between different types of electronic states involved in exciton dissociation as a function of electron-hole distance between the future states' CT components. The NACEs for a transition between two eigenstate types are sampled from all timesteps for each X-SH simulation, and weighted according to the potential energy difference between the active and future eigenstates. (a) Plot of weighted NACE sums concerning transitions between XT and hybrid XT-CT states, where the total ensemble of sampled hybrid states has been separated into 5 bins, according to the expectation value of the electron-hole distance in each hybrid state. The  $x$ -value of each point corresponds to the mid-point of a distance bin. The vertical purple line denotes the electron-hole distance of the quasi-diabatic iCT state. (b) Weighted NACE sums of transitions between hybrid XT-CT states and pure CT states, where the CT states are now resolved by their expectation value for the electron-hole distance. The red dotted line denotes the maximum possible electron-hole distance in the electronically active region.

with the highest weighted NACE sum, which may contradict the relative dominance of niCT and CS states observed in the population dynamics of simulation (5). However, this is due to the bin in question still containing hybrid states with niCT character, as the interfacial electron-hole distance is only 0.98 nm. Fig. S9b plots  $D_{ba}$  between an initial active hybrid XT-CT eigenstate, and sets of pure CT states resolved by their electron-hole distance. Regarding simulation (1), all NACE sums are similarly small, as every distance bin contains niCT states which are thermally inaccessible due to the strength of the Coulomb interaction. The smallest distance bin also has a small  $D_{ba}$  because it likely undersamples the iCT state, to which virtually all hybrid states relax. This is because the direct electronic coupling between the interfacial quasi-diabatic XT state and iCT state can result in a hybrid XT-CT state of mostly iCT character, which subsumes the pure iCT state in the electronic structure of the junction during the time frame of exciton dissociation. The XT character of such a hybrid state is subsequently reduced by the reorganisation of the a6T and PDI molecules, which effaces the hybridisation caused by the electronic coupling between diabatic states. As observed for the  $D_{ba}$  for exciton-to-hybrid transitions in panel a, the  $D_{ba}$  values of hybrid-to-CT transitions increase for all electron-hole distances as the electronic coupling is increased or  $E_b$  decreased. This indicates that niCT states are indeed more likely to be accessed directly from exciton dissociation, from which the CS can be accessed via the hot pathway.

## S10 Convergence of exciton dissociation with respect to number of trajectories

Each simulation type was carried out with 500 independent trajectories. Each trajectory was propagated for 10 ps, to sample as much of the exciton relaxation process as possible, under the current computational constraints. A key result obtained from our study is the advent of non-interfacial exciton dissociation as a function of the energy landscape of the CT-band. The electronic structure of X-SH is embedded within the Fewest-switches Surface Hopping [13] framework, where each trajectory evolves stochastically based on the instantaneous transition probability from the current active state to any other state that is sufficiently close in energy. Due to the stochasticity of the trajectories, events (such as non-interfacial exciton dissociation) that do not reflect the broad physics of the system may still be observed, but their contribution to thermal properties should be effaced through adequate sampling of the phase space. Therefore, it is paramount to ensure that the manner of exciton dissociation is converged with respect to the number of trajectories in each simulation. This can be checked by plotting the accumulated average of the exciton dissociation distance, as well as the accumulated standard error, as a function of the number of trajectories. The exciton dissociation distance of each trajectory is calculated by first obtaining the final timestep before the total electronic wavefunction evolves into a hybrid state from a pure exciton state, in the process of its full conversion into a CT-state, which persists for at least half a picosecond afterward. At this timestep, the expectation value of the exciton’s distance (with respect to the interface) is calculated, by calculating the sum of each PDI molecule’s  $x$ -coordinate weighted by the squared expansion coefficient of the associated exciton diabatic. Fig. S8 displays the accumulated averages (lines and dots) and standard errors (shaded region) of the exciton dissociation distance for simulations (1) - (7), from which it is apparent that convergence has been achieved for all simulation types. For simulations where most excitons are dissociating near the interface, such as (1), the standard error remains small and effectively constant throughout the averaging process, as all trajectories are effectively dissociating next to the interface. Conversely, the standard error is initially much larger for simulations exhibiting non-interfacial dissociation, such as (6) and (7), as the range of possible dissociation distances now spans the entire PDI phase.

The relative contributions of the hot and cold charge generation pathways to each simulation type are obtained by tracking the evolution of the electronic wavefunction  $\Psi(t)$  of each trajectory, and categorising the decay pathway of the trajectory by the series of electronic state-types it occupies over the time frame of the dynamics. It was also observed that the incidence of hot exciton dissociation significantly increases as the density of niCT states increases at the energy level of the exciton.

To ensure that this trend is also representative of the underlying dynamics, we have plotted the percentage contributions of the hot and cold charge generation pathways (with respect to all dissociated trajectories) as a function of the total number of trajectories in Figs. S11a and S11b, respectively. The percentage of trajectories proceeding via the cold pathway converges after 400 trajectories, whilst the percentage of trajectories proceeding via the hot pathway converges after 300. We have plotted

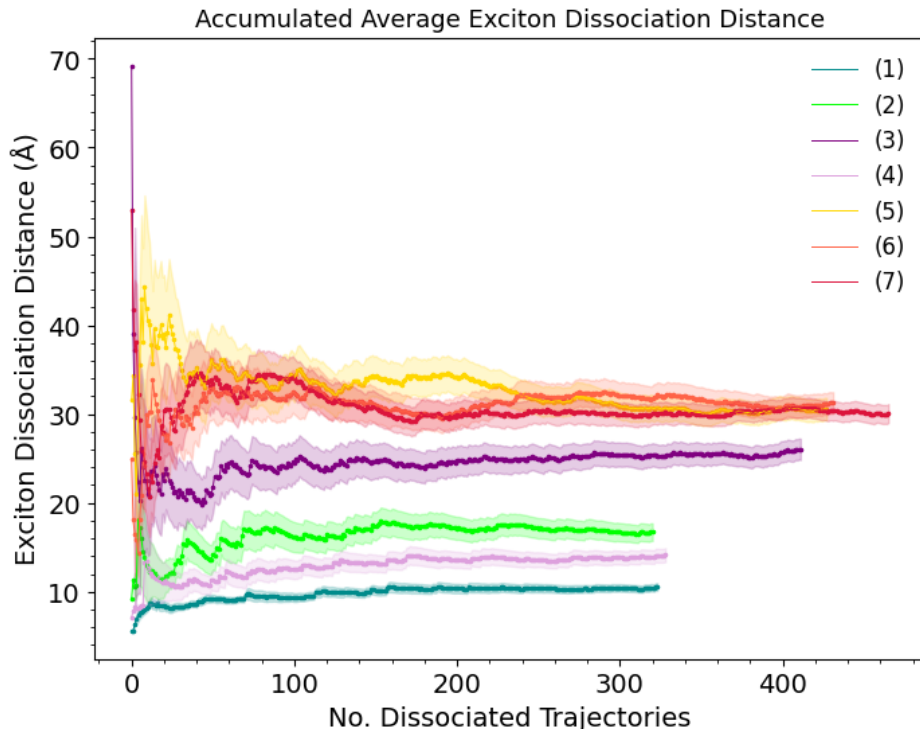

**Fig. S10** Plot of the accumulated average of the exciton dissociation distance with respect to the interface, for all simulations included in this study. The accumulated averages are shown by the lines and dots, whilst the error bars, given by the standard error at each  $x$ -value, are plotted as shaded regions. The mean dissociation distance is plotted against the number of dissociated trajectories in each simulation.

the convergence for simulations (2) - (7), as simulation (1) does not exhibit charge separation on the 10 ps timescale due to the strength of the Coulombic electron-hole interaction. It should be noted that the contributions of the different mechanisms are specifically converged with respect to the simulation time of 10 ps, as the majority of trajectories are still in iCT or niCT states by the end of each simulation.

## S11 Convergence exciton dissociation with respect to nuclear timestep

The nuclear positions in X-SH are propagated with the velocity verlet algorithm. X-SH is always propagated in the NVE regime, so the total system energy should be conserved throughout the dynamics. The contributions of the nuclear gradients of the electronic CT and XT-CT couplings with respect to the total atomic forces constitute the largest source of energy drift in X-SH, as these are calculated via finite differences at each nuclear timestep. Conversely, the nuclear gradients of the diagonal elements of the electronic Hamiltonian and the excitonic couplings can be calculated analytically,

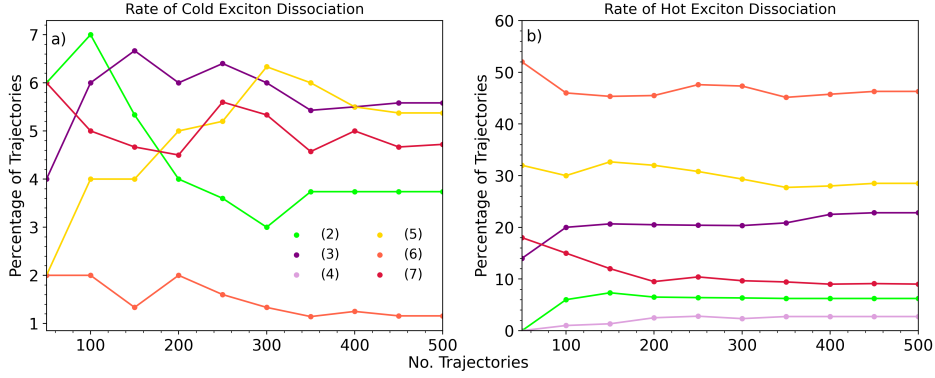

**Fig. S11** Plots checking the convergence of hot and cold pathways of charge generation with respect to the number of trajectories sampled. **(a)** Plot of percentage contribution of the cold exciton dissociation pathway, as a function of trajectories in X-SH, for simulations (2) - (7). Convergence has been achieved for all simulations after 400 trajectories. **(b)** Plot of percentage contribution of the hot exciton dissociation pathway as a function of X-SH trajectories, with convergence being achieved when more than 300 (10 ps) trajectories have been sampled. The percentages have been calculated with respect to the total number of dissociated trajectories; trajectories where the exciton has not yet dissociated have been neglected when sampling the decay pathways of the trajectories.

such that their contribution to the energy drift will be orders of magnitude smaller. Therefore, one must carefully tune the nuclear timestep of X-SH such that any further reductions in timestep return a miniscule improvement in energy conservation. We therefore performed a 300 fs X-SH run with a 2-dimensional active region in the a6T:PDI heterojunction, with 930 diabatic states (30 active donor/acceptor molecules). For 6 different nuclear timesteps (0.01–0.13 fs), we calculated the average energy drift of 100 trajectories by subtracting the final from the initial total energies, then dividing the difference by the number of atoms in the electronically active region and the simulation time in ps. Fig. S12 consistently stays below  $10^{-7} E_h \text{ ps}^{-1} \text{ atom}^{-1}$ , which is similar to the energy drift values calculated in our previous work [14]. We therefore selected a nuclear timestep of 0.05 fs for all X-SH simulations included in the main text; this provides a good compromise between energy conservation and computational expense, as the compute time of X-SH scales inversely with the nuclear timestep.

To further ensure that the nuclear timestep is also small enough to detect potentially trivial crossings between eigenstates of the electronic Hamiltonian in FSSH, we repeated the first ps of X-SH dynamics with a nuclear timestep of 0.01 fs. This was undertaken for the simulations that displayed the lowest and highest CS yields, namely (1) and (6), as shown in Table 2 in the main text. To check that the manner of exciton dissociation was conserved upon the reduction of the timestep, Figs. S13a plots the distribution of trajectories' electron-hole distances immediately following exciton dissociation, whilst S13b plots the corresponding distribution of exciton distances (with respect to the interface). At both timesteps, the vast majority of excitons still dissociate at the heterojunction interface, and form iCT states localised on the interfacial a6T:PDI pair. S13c displays the differences between electronic populations of the different types of states, as defined by Eqs. 17-20 in the main text, for 0.05 and 0.01 fs.

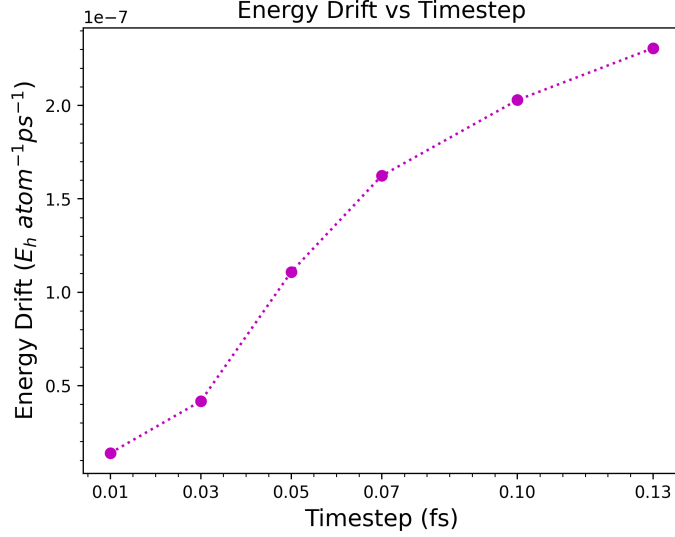

**Fig. S12** Plot of the energy drift as a function of nuclear timestep, averaged over 100 X-SH trajectories for a two-dimensional reference system with 930 quasi-diabatic states. Each trajectory lasted 300 fs, and the simulation was repeated for 6 different nuclear timesteps, ranging from 0.01 – 0.13 fs. All nuclear timesteps provided energy drifts that were comparable to that observed in previous work.

552 A reduction of the timestep results in a minor reduction in the rate of exciton dissociation - and consequently a smaller  $P_{CT}$  - but not enough to significantly change the  
 553  
 554 main relaxation pathway of the exciton.

555 Simulation (6) is expected to display the highest density of CT states relative to the  
 556 typical energy level of the relaxed exciton, and is therefore expected to be most affected  
 557 by potential trivial crossings. Figs. S13d and S13e display the electron-hole and exciton  
 558 distance distributions upon exciton dissociation. Both timesteps capture the increased  
 559 probability of non-interfacial exciton dissociation and the direct population of niCT  
 560 states thereafter, signified by the electron-hole distance distribution shifting to higher  
 561 distances. The electronic population differences (Fig. S13f) indicate a slower reduction  
 562 in  $P_{XT}$  upon going from a 0.05 to 0.01 fs timestep, and consequently smaller CT state  
 563 populations. Despite this, the faster exciton dissociation and charge separation upon  
 564 going from (1) to (6) is significantly larger than that predicted by Kinetic Monte  
 565 Carlo simulations in the same parameter regimes. We therefore regard 0.05 fs as an  
 566 efficient compromise between the effect of trivial crossings on the exciton dissociation  
 567 mechanism and the sufficient sampling of statistics.

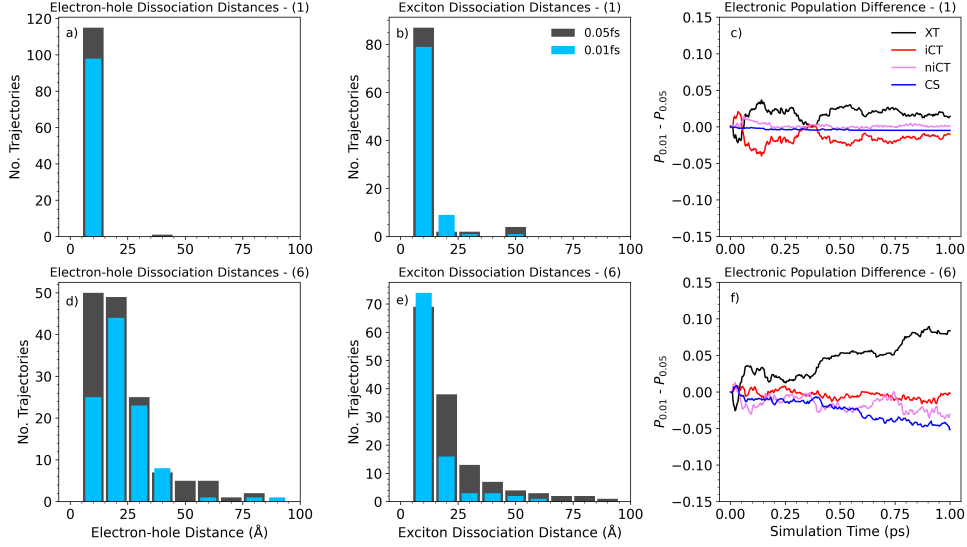

**Fig. S13** Plots of the differences in key observables of exciton dissociation caused by a reduction in nuclear timestep from 0.05 to 0.01 fs, for simulations (1) and (6). Panels (a) and (d) display distributions of electron-hole distances immediately following exciton dissociation, for all trajectories that have exhibited exciton dissociation within 1 ps. Exciton dissociation in a single trajectory is taken as  $P_{XT}$  decreasing below 0.05, and not increasing above this cutoff for the next 0.5 ps, as outlined in Section S6. Panels (b) and (e) display distributions of exciton distances, with respect to the heterojunction interface (Eq. S13), that immediately precede exciton dissociation. Panels (c) and (f) plot the signed differences in the electronic populations of different types of quasi-diabatic states, as defined by Eqs. 17-20 in the main text, due to the reduction of the nuclear timestep from 0.05 to 0.01 fs.

## 568 S12 Validation of electronic coupling calculation

569 As mentioned in the main text, the electronic coupling between CT states (via hole  
 570 or electron transfer) or that between CT and XT states can be estimated through  
 571 the approximate relationship  $H_{ab} = \bar{C}\bar{S}_{ab}$ , where  $\bar{S}_{ab}$  refers to the overlap between  
 572 the frontier orbitals involved in charge transfer (HOMO-HOMO or LUMO-LUMO  
 573 overlap), and  $\bar{C}$  is a constant of proportionality that can be scaled to maximise agree-  
 574 ment between  $H_{ab}$  and  $\bar{S}_{ab}$ . The orbital overlap between a given pair molecules is  
 575 rapidly calculated each timestep with AOM. We refer to previous work for a detailed  
 576 explanation. To test the ability of AOM to capture the electronic charge-transfer cou-  
 577 pling between a6T and PDI molecules, we sample 100 a6T and PDI dimers from a  
 578 1 ps X-SH run at 300 K. Fig. S14a plots the electronic coupling calculated for each  
 579 dimer using Density Functional Theory (DFT) followed by Projection Operator-based  
 580 Diagonalisation (POD), against the AOM-calculated overlap. The straight line plots  
 581  $H_{ab} = \bar{C}\bar{S}_{ab}$  for the given overlap range and scaling constant used in AOM. Therefore,  
 582 closer points to the line indicate a better agreement between POD and AOM. Good  
 583 agreement is obtained between POD and AOM for CT electronic couplings via both  
 584 HOMO-HOMO and LUMO-LUMO overlap.

585 We estimate the electronic coupling between the interfacial quasi-diabatic XT and  
 586 iCT states,  $H_{k,mn}^{XT-CT}$ , which facilitates hole transfer from the excitonic PDI to the  
 587 neutral a6T molecule, by calculating the HOMO-HOMO overlap between the two  
 588 molecules with AOM. To test the ability of AOM in sufficiently capturing this coupling,  
 589 we sample 25 interfacial a6T:PDI dimer geometries from the same 1 ps X-SH run,  
 590 and calculate  $H_{k,mn}^{XT-CT}$  via TDDFT followed by MS-FED-FCD diabatisation. Upon  
 591 plotting such couplings against AOM overlaps for the same dimer geometries, it is  
 592 evident that AOM’s performance has markedly decreased. However, since there is still  
 593 a positive correlation between  $H_{ab}$  and  $\bar{S}_{ab}$ , we expect that AOM will broadly be able  
 594 to capture the effect of thermal fluctuations on  $H_{k,mn}^{XT-CT}$ , since the orbital interactions  
 595 involved in hole transfer between the excitonic PDI and neutral a6T molecules are  
 596 still pertinent to  $H_{k,mn}^{XT-CT}$ .

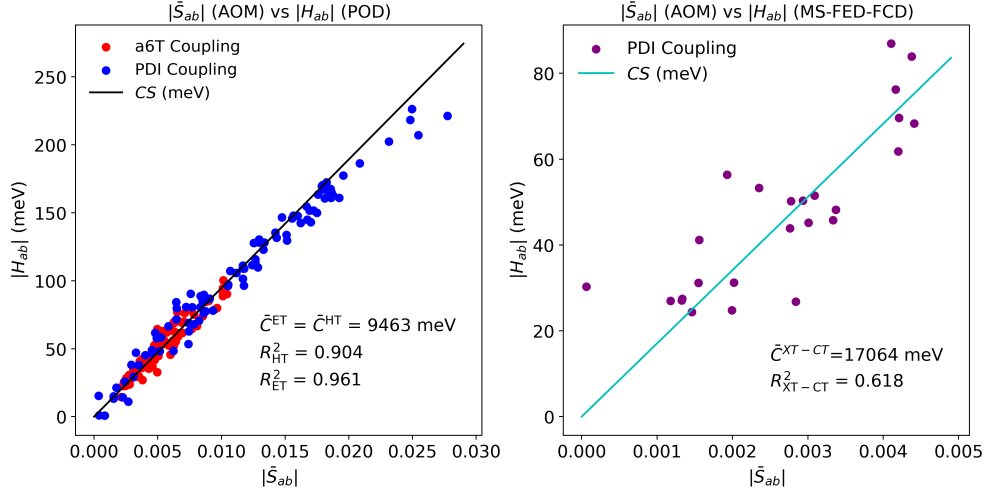

**Fig. S14** Plots that compare the accuracy of AOM in calculating electronic couplings in the a6T:PDI heterojunction compared to DFT benchmarks. Panel (a) plots electronic couplings via hole transfer between adjacent a6T molecules or electron transfer between PDI molecules, calculated using DFT (and POD), against the relevant orbital overlaps calculated using AOM. Each point corresponds to a single dimer geometry sampled from a 1 ps X-SH run at 300 K. Panel (b) plots the electronic coupling between an interfacial PDI exciton and a quasi-diabatic iCT state for an interfacial a6T:PDI dimer, obtained from TDDFT and subsequent MS-FED-FCD diabatisation, against the HOMO-HOMO overlaps calculated by AOM for the same dimer geometries.

## References

1. Spencer, J., Scalfi, L., Carof, A., Blumberger, J.: Confronting surface hopping molecular dynamics with marcus theory for a molecular donor–acceptor system. *Faraday Discuss.*, **195**, 215–236 (2016)
2. Giannini, S., Carof, A., Blumberger, J.: Crossover from hopping to band-like charge transport in an organic semiconductor model: Atomistic nonadiabatic molecular dynamics simulation. *J. Phys. Chem. Lett.*, **9**, 3116–3123 (2018)
3. Yang, H., Gajdos, F., Blumberger, J.: Intermolecular charge transfer parameters, electron–phonon couplings, and the validity of polaron hopping models in organic semiconducting crystals: Rubrene, pentacene, and C60. *J. Phys. Chem. C*, **121**, 7689–7696 (2017)
4. Blumberger, J.: Recent advances in the theory and molecular simulation of biological electron transfer reactions. *Chem. Rev.*, **115**, 11191–11238 (2015)
5. Kelley, A.M.: *Condensed-phase Molecular Spectroscopy and Photophysics.*, pp. 38–42. Wiley, Hoboken, N.J (2013)
6. Persico, M., Granucci, G.: *Photochemistry: A Modern Theoretical Perspective.*, pp. 87–100. Springer, Gewerbestrasse, Cham (2018)
7. Giannini, S. *et al.*: On the role of charge transfer excitations in non-fullerene acceptors for organic photovoltaics. *Mater. Today*, **80**, 308–326 (2024)
8. Case, D.A. *et al.*: AMBER 10. University of California (2008)
9. Donnelly, T.D., Grossman, C.: Ultrafast phenomena: A laboratory experiment for undergraduates. *Am. J. Phys.*, **66**(8), 677–685 (1998)
10. Virtanen, P. *et al.*: SciPy 1.0: Fundamental Algorithms for Scientific Computing in Python. *Nat. Methods*, **17**, 261–272 (2020)
11. Branch, M.A., Coleman, T.F., Li, Y.: A subspace, interior, and conjugate gradient method for large-scale bound-constrained minimization problems. *SIAM J. Sci. Comput.*, **21**, 1–23 (1999)
12. Baer, R.: Non-adiabatic couplings by time-dependent density functional theory. *Chem. Phys. Lett.*, **364**, 75–79 (2002)
13. Tully, J.: Molecular dynamics with electronic transitions. *J. Chem. Phys.*, **93**, 1061–1071 (1990)
14. Giannini, S., Ziogos, O.G., Carof, A., Ellis, M., Blumberger, J.: Flickering polarons extending over ten nanometres mediate charge transport in high-mobility organic crystals. *Adv. Theory Simul.*, **3**, 2000093 (2020)
